# Supplementary material for: Association of Kidney Disease, Potassium, and Cardiovascular Risk Factor Prevalence with Coronary Arteriosclerotic Burden, by Sex
Source: MDPI journal article supplement (doi:10.3390/jpm11080722), 2021-07-27
Supplement: s1 [file s1]

### Supplementary Information

**Table S1:** Characteristics of Subjects according to atherosclerotic coronary lesions with  $\geq 30\%$  stenosis (CALS-30) in women.

| Characteristics                        | No CALS-30<br>N=297 | Any CALS-30<br>N= 259 | p-value          |
|----------------------------------------|---------------------|-----------------------|------------------|
| Age, years *                           | 64.9 (10.8)         | 67.3 (11.7)           | <b>0.015</b>     |
| > 55 years Men/>65 Woman               | 48.5%               | 56.4%                 | 0.076            |
| Never-smoker / ex-smoker $\geq 1$ year | 85.9%               | 78.4%                 | <b>0.010</b>     |
| Ex-smoker < 1 year                     | 4.04%               | 2.70%                 |                  |
| Current smoker                         | 10.1%               | 18.9%                 |                  |
| Hypertension                           | 61.6%               | 80.7%                 | <b>&lt;0.001</b> |
| BMI                                    | 29.3 (5.84)         | 28.5 (5.51)           | 0.089            |
| BMI >30                                | 39.6%               | 32.9%                 | 0.137            |
| Previous PTCA                          | 2.02%               | 6.56%                 | <b>0.014</b>     |
| Diabetes or glycemia > 126 mg/dl       | 41.4%               | 64.9%                 | <b>&lt;0.001</b> |
| Kidney disease or eGFR<60 ml/min       | 22.9%               | 35.5%                 | <b>0.001</b>     |
| <b>Laboratory determinations</b>       |                     |                       |                  |
| Creatinine mg/dL **                    | 0.78 (0.67-0.92)    | 0.84 (0.70-1.11)      | <b>0.001</b>     |
| BUN mg/dL **                           | 15.9 (12.6-19.6)    | 16.1 (13.2-20.2)      | 0.177            |
| Potassium mmol/L **                    | 4.40 (4.00-4.70)    | 4.30 (3.95-4.70)      | 0.240            |
| Glycemia mg/dL **                      | 106 (93.0-131)      | 133 (105-192)         | <b>&lt;0.001</b> |
| GFR by CKD-EPI ml/min *                | 77.5 (22.5)         | 68.7(26.2)            | <b>&lt;0.001</b> |

GRF: estimated glomerular filtration rate, CKD-EPI: Chronic Kidney Disease Epidemiology

Collaboration; PTCA: percutaneous transcatheter coronary angioplasty.

\* Mean (standard deviation), \*\* Median (Interquartile range)

**Table S2:** Characteristics of Subjects according to atherosclerotic coronary lesions with  $\geq 30\%$  stenosis (CALS-30) in men.

| Characteristics                        | No CALS-30<br>N=335 | Any CALS-30<br>N= 259 | p-value          |
|----------------------------------------|---------------------|-----------------------|------------------|
| Age, years *                           | 61.0 (12.4)         | 62.7 (11.3)           | <b>0.031</b>     |
| > 55 years Men/>65 Woman               | 69.9%               | 72.4%                 | 0.424            |
| Never-smoker / ex-smoker $\geq 1$ year | 80.9%               | 70.6%                 | <b>&lt;0.001</b> |
| Ex-smoker < 1 year                     | 5.67                | 6.26%                 |                  |
| Current smoker                         | 13.4%               | 23.2%                 |                  |
| Hypertension                           | 50.7%               | 55.8%                 | 0.140            |
| Body mass index *                      | 29.8 (16.3)         | 28.1 (4.73)           | 0.073            |
| Body mass index >30                    | 37.9%               | 27.4%                 | <b>0.001</b>     |
| Previous PTCA                          | 3.88%               | 5.46%                 | 0.340            |
| Diabetes or glycemia > 126 mg/dl       | 27.8%               | 43.0%                 | <b>&lt;0.001</b> |
| Kideney disease or eGFR<60 ml/min      | 17.6%               | 35.5%                 | 0.172            |
| <b>Laboratory determinations</b>       |                     |                       |                  |
| Creatinine mg/dL **                    | 0.99 (0.81-1.12)    | 0.84 (0.70-1.11)      | 0.291            |
| BUN mg/dL **                           | 17.0 (14.4-20.1)    | 16.1 (13.2-20.2)      | 0.171            |
| Potassium mmol/L **                    | 4.46 (4.20-4.80)    | 4.30 (3.95-4.70)      | <b>0.002</b>     |
| Glycemia mg/dL **                      | 103 (94.0-117)      | 133 (105-192)         | <b>&lt;0.001</b> |
| GFR by CKD-EPI ml/min *                | 81.0 (22.6)         | 68.7(26.2)            | 0.118            |

**GRF:** estimated glomerular filtration rate, **CKD-EPI:** Chronic Kidney Disease Epidemiology Collaboration; **PTCA:** percutaneous transcatheter coronary angioplasty.

\* Mean (standard deviation), \*\* Median (Interquartile range)

**Table S3:** Description of procedures on subjects by presence of coronary atherosclerotic lesions with >30% stenosis (CALS-30) in women.

|                                               | No CALS-30 | Any CALS-30 |                  |
|-----------------------------------------------|------------|-------------|------------------|
|                                               | N=297      | N=259       | p-value          |
| <b>Reason for study inclusion</b>             |            |             |                  |
| <b>ST elevation myocardial infarction</b>     | 6.06%      | 33.6%       | <b>&lt;0.001</b> |
| <b>Non-ST-elevation myocardial infarction</b> | 14.5%      | 24.7%       |                  |
| <b>Unstable Angina</b>                        | 12.5%      | 9.27%       |                  |
| <b>Chronic Angina</b>                         | 26.9%      | 18.5%       |                  |
| <b>Preoperative valve surgery</b>             | 17.2%      | 1.93%       |                  |
| <b>None of the above</b>                      | 22.9%      | 12.0%       |                  |

**Table S4:** Description of Procedures on subjects according to significant injuries in men.

|                                        | No CALS-30<br>N=335 | ≥ 1 CALS-30<br>N=751 | p-value |
|----------------------------------------|---------------------|----------------------|---------|
| Reason for study inclusion             |                     |                      |         |
| ST elevation myocardial infarction     | 12.2%               | 43.1%                | <0.001  |
| Non-ST-elevation myocardial infarction | 8.96%               | 24.9%                |         |
| Unstable Angina                        | 11.0%               | 8.52%                |         |
| Chronic Angina                         | 21.8%               | 12.6%                |         |
| Preoperative valvular surgery          | 11.0%               | 1.20%                |         |
| None of the above                      | 34.9%               | 9.59%                |         |

**Table S5:** Odds ratio of coronary atherosclerotic lesions with  $\geq 30\%$  stenosis for classical cardiovascular risk factors adjusted for age and potassium in women.

|                                                                                             | Odds ratio (95% confidence interval) |                    |
|---------------------------------------------------------------------------------------------|--------------------------------------|--------------------|
|                                                                                             | Model 1                              | Model 2            |
| <b>Age</b>                                                                                  | 1.02 (1.00; 1.03)                    | 1.02 (1.00; 1.03)  |
| <b>Ex-smoker <math>\geq 1</math> year</b>                                                   | 0.99 (0.37; 2.68)                    | 0.77 (0.27; 2.19)  |
| <b>Smoker / Ex-smoker &lt; 1 year</b>                                                       | 2.32 (1.37; 3.93)                    | 2.11 (1.23; 3.63)  |
| <b>Hypertension</b>                                                                         | 1.62 (1.05; 2.50)                    | 1.56 (1.00; 2.44)  |
| <b>Diabetes</b>                                                                             | 2.14 (1.47; 3.12)                    | 2.09 (1.41; 3.10)  |
| <b>Kidney disease or eGFR&lt;60 ml/min</b>                                                  | 1.46 (0.96; 2.21)                    | 1.59 ( 1.03; 2.47) |
| <b>Potassium</b>                                                                            |                                      | 0.79 (0.57; 1.10)  |
| <b>Model 1: N: 556 (cases 259), AUC: 0.684 (0.639-0.728)</b>                                |                                      |                    |
| <b>Model 2 further adjusted for potassium: N: 514 (cases 243), AUC: 0.679 (0.633-0.725)</b> |                                      |                    |

**Table S6:** Odds ratio of coronary atherosclerotic lesions with  $\geq 30\%$  stenosis for classical cardiovascular risk factors adjusted for age and potassium in men.

|                                                         | Odds ratio (95% confidence interval) |                   |
|---------------------------------------------------------|--------------------------------------|-------------------|
|                                                         | Model 1                              | Model 2           |
| <b>Age</b>                                              | 1.02 (1.00; 1.03)                    | 1.02 (1.00; 1.03) |
| <b>Ex-smoker <math>\geq 1</math> year</b>               | 1.58 (0.88; 2.84)                    | 1.59 (0.88; 2.86) |
| <b>Smoker / Ex-smoker <math>&lt; 1</math> year</b>      | 2.20 (1.48; 3.27)                    | 2.21 (1.49; 3.29) |
| <b>Hypertension</b>                                     | 0.82 (0.60; 1.10)                    | 0.82 (0.60; 1.10) |
| <b>Diabetes</b>                                         | 2.05 (1.50; 2.80)                    | 2.04 (1.50; 2.79) |
| <b>Kidney disease or eGFR<math>&lt;60</math> ml/min</b> | 1.27 (0.86; 1.87)                    | 1.34 (0.93; 1.94) |
| <b>Potassium</b>                                        |                                      | 0.67 (0.51; 0.87) |

**Model 1:** N: 1086 (cases 751), **AUC:** 0.628 (0.592-0.664)

**Model 2 further adjusted for potassium:** N: 1011 (cases 703), **AUC:** 0.647 (0.610-0.683)

**Table S7:** Odds ratio of coronary atherosclerotic lesions with  $\geq 30\%$  stenosis for a cardiovascular risk score with the accumulation of diabetes, smoking, glomerular filtrate rate $<60$  min/ml and hypertension, adjusted for age and potassium in women.

| Odds ratio (95% confidence interval) |                   |                   |
|--------------------------------------|-------------------|-------------------|
|                                      | Model 1           | Model 2           |
| Age                                  | 1.01 (1.00; 1.03) | 1.01 (1.00; 1.03) |
| Cardiovascular Risk SCORE            | 1.84 (1.53; 2.20) | 1.82 (1.51; 2.20) |
| Potassium                            |                   | 0.79 (0.58; 1.10) |

**Model 1:** N: 556 (cases 259), AUC: 0.678 (0.634-0.723)

**Model 2 further adjusted for potassium:** N: 514 (cases 243), AUC: 0.673 (0.627-0.720)

**Table S8:** Odds ratio of coronary atherosclerotic lesions with  $\geq 30\%$  stenosis for a cardiovascular risk score with the accumulation of diabetes, smoking, glomerular filtrate rate  $< 60$  ml/min and hypertension, adjusted for age and potassium in men.

|                                  | Odds ratio (95% confidence interval) |                   |
|----------------------------------|--------------------------------------|-------------------|
|                                  | Model 1                              | Model 2           |
| <b>Age</b>                       | 1.01 (1.00; 1.02)                    | 1.01 (1.00; 1.02) |
| <b>Cardiovascular Risk SCORE</b> | 1.33 (1.17; 1.52)                    | 1.36 (1.18; 1.56) |
| <b>Potassium</b>                 |                                      | 0.66 (0.51; 0.86) |

**Model 1:** N: 1086 (cases 751), **AUC:** 0.591 (0.554-0.627)

**Model 2 further adjusted for potassium:** N: 1011 (cases 703), **AUC:** 0.610 (0.572-0.648)



**Table S9:** Characteristics of Subjects according to coronary atherosclerotic lesions with  $\geq$  50% stenosis (CALS-50).

| Characteristics                      | No CALS-50<br>N= 673 | $\geq$ 1 CALS-50<br>N= 969 | p-value          |
|--------------------------------------|----------------------|----------------------------|------------------|
| Age, years *                         | 63.0 (12.1)          | 63.8 (11.5)                | 0.159            |
| > 55 years Men/>65 Woman             | 60.3%                | 68.3%                      | <b>0.001</b>     |
| Sex: woman                           | 45.8%                | 25.6%                      | <b>&lt;0.001</b> |
| Non-smoker / Ex-smoker $\geq$ 1 year | 83.2%                | 72.1%                      | <b>&lt;0.001</b> |
| Ex-smoker < 1 year                   | 4.6%                 | 5.6%                       |                  |
| Current smoker                       | 12.2%                | 22.3%                      |                  |
| Hypertension                         | 55.1%                | 63.0%                      | <b>0.002</b>     |
| Body mass index                      | 29.5 (12.2)          | 28.2 (4.97)                | <b>0.016</b>     |
| Body mass index >30                  | 38.1%                | 28.8%                      | <b>&lt;0.001</b> |
| Previous PTCA                        | 3.27%                | 5.68%                      | <b>0.032</b>     |
| Diabetes or glycemia > 126 mg/dl     | 34.8%                | 48.8%                      | <b>&lt;0.001</b> |
| Kidney disease or eGFR<60 ml/min     | 19.9%                | 22.7%                      | 0.196            |
| <b>Laboratory determinations</b>     |                      |                            |                  |
| Creatinine mg/dL **                  | 0.90 (0.72;1.07)     | 0.95 (0.80;1.15)           | <b>&lt;0.001</b> |
| BUN mg/dL **                         | 16.4 (13.5;20.0)     | 16.4 (13.6;20.2)           | 0.884            |
| Potassium mmol/L **                  | 4.40 (4.11;4.80)     | 4.30 (4.00;4.70)           | <b>0.001</b>     |
| Glycemia mg/dL **                    | 104 (94.0;123)       | 121 (100;157)              | <b>&lt;0.001</b> |
| GFR by CKD-EPI ml/min *              | 78.8 (23.2)          | 76.3 (23.7)                | <b>0.037</b>     |

**GFR:** estimated glomerular filtration rate, **CKD-EPI:** Chronic Kidney Disease Epidemiology Collaboration; **PTCA:** percutaneous transcatheter coronary angioplasty.

\* Mean (standard deviation), \*\* Median (Interquartile range)

**Table S10:** Characteristics of Subjects according to atherosclerotic coronary lesions with  $\geq 70\%$  stenosis (CALS-70).

| Characteristics                      | No CALS-70<br>N= 754 | $\geq 1$ CALS-70<br>N= 888 | p-value          |
|--------------------------------------|----------------------|----------------------------|------------------|
| Age, years *                         | 63.3 (12.1)          | 63.6 (11.4)                | 0.601            |
| > 55 years Men/>65 Woman             | 61.7%                | 67.9%                      | <b>0.010</b>     |
| Sex: woman                           | 44.4%                | 24.9%                      | <b>&lt;0.001</b> |
| Non-smoker / Ex-smoker $\geq 1$ year | 83.3%                | 71.1%                      | <b>&lt;0.001</b> |
| Ex-smoker < 1 year                   | 4.2%                 | 6.0                        |                  |
| Smoker                               | 12.5%                | 23.0%                      |                  |
| Hypertension                         | 34.2%                | 46.3%                      | <b>&lt;0.001</b> |
| Body mass index *                    | 29.4 (11.9)          | 28.2 (4.44)                | <b>0.016</b>     |
| Body mass index >30                  | 36.6%                | 29.2%                      | <b>0.002</b>     |
| Previous PTCA                        | 4.24%                | 5.07%                      | 0.503            |
| Diabetes or glycemia > 126 mg/dl     | 36.2%                | 48.9%                      | <b>&lt;0.001</b> |
| Renal Failure or eGFR<60 ml/min      | 20.8%                | 22.2%                      | 0.543            |
| <b>Laboratory determinations</b>     |                      |                            |                  |
| Creatinine mg/dL **                  | 0.90 [0.73;1.10]     | 0.95 [0.80;1.14]           | <b>&lt;0.001</b> |
| BUN mg/dL **                         | 16.6 [13.5;20.0]     | 16.4 [13.6;20.0]           | 0.712            |
| Potassium mmol/L **                  | 4.40 [4.10;4.80]     | 4.30 [4.01;4.70]           | <b>0.007</b>     |
| Glycemia mg/dL **                    | 105 [94.0;125]       | 121 [100;159]              | <b>&lt;0.001</b> |
| GFR by CKD-EPI ml/min *              | 78.2 (23.6)          | 76.6 (23.5)                | 0.198            |

**GFR:** estimated glomerular filtration rate, **CKD-EPI:** Chronic Kidney Disease Epidemiology Collaboration; **PTCA:** percutaneous transcatheter coronary angioplasty.

\* Mean (standard deviation), \*\* Median (Interquartile range)

**Table S11:** Odds ratio of coronary atherosclerotic lesions with  $\geq 50\%$  stenosis for classical cardiovascular risk factors adjusted for age and sex (Model 1) and, additionally, potassium (Model 2).

|                                                                                             | Odds ratio (95% confidence interval) |                    |
|---------------------------------------------------------------------------------------------|--------------------------------------|--------------------|
|                                                                                             | Model 1                              | Model 2            |
| <b>Age</b>                                                                                  | 1.02 (1.01; 1.02)                    | 1.01 (1.00; 1.02)  |
| <b>Sex: women</b>                                                                           | 0.34 (0.27; 0.43)                    | 0.331 (0.26; 0.42) |
| <b>Ex-smoker <math>\geq 1</math> year</b>                                                   | 1.56 (0.97; 2.52)                    | 1.51 (0.93; 2.47)  |
| <b>Smoker / Ex-smoker <math>&lt; 1</math> year</b>                                          | 2.12 (1.57; 2.85)                    | 2.04 (1.50; 2.79)  |
| <b>Hypertension</b>                                                                         | 1.17 (0.92; 1.48)                    | 1.12 (0.88; 1.44)  |
| <b>Diabetes</b>                                                                             | 1.95 (1.55; 2.45)                    | 1.99 (1.57; 2.53)  |
| <b>Kidney disease or GFR<math>&lt;60</math> ml/min</b>                                      | 1.13 (0.86; 1.47)                    | 1.29 (0.97; 1.71)  |
| <b>Potassium</b>                                                                            |                                      | 0.67 (0.55; 0.83)  |
| <b>Model 1: N: 1642 (cases 969), AUC: 0.673 (0.646-0.700)</b>                               |                                      |                    |
| <b>Model 2 further adjusted for potassium: N: 1525 (cases 905), AUC: 0.68 (0.653-0.708)</b> |                                      |                    |

**Table S12:** Odds ratio of coronary atherosclerotic lesions with  $\geq 70\%$  stenosis for classical cardiovascular risk factors adjusted for age and sex (Model 1) and, additionally, potassium (Model 2).

|                                                        | Odds ratio (95% confidence interval) |      |      |         |      |      |
|--------------------------------------------------------|--------------------------------------|------|------|---------|------|------|
|                                                        | Model 1                              |      |      | Model 2 |      |      |
| <b>Age</b>                                             | 1.01                                 | 1.00 | 1.02 | 1.01    | 1.00 | 1.02 |
| <b>Sex: women</b>                                      | 0.36                                 | 0.29 | 0.45 | 0.36    | 0.28 | 0.45 |
| <b>Ex-smoker <math>\geq 1</math> year</b>              | 1.78                                 | 1.11 | 2.85 | 1.71    | 1.05 | 2.77 |
| <b>Smoker / Ex-smoker <math>&lt; 1</math> year</b>     | 2.15                                 | 1.61 | 2.87 | 2.05    | 1.52 | 2.77 |
| <b>Hypertension</b>                                    | 1.08                                 | 0.86 | 1.36 | 1.03    | 0.81 | 1.31 |
| <b>Diabetes</b>                                        | 1.88                                 | 1.50 | 2.35 | 1.94    | 1.54 | 2.45 |
| <b>Kidney disease or GFR<math>&lt;60</math> ml/min</b> | 1.07                                 | 0.82 | 1.39 | 1.18    | 0.90 | 1.56 |
| <b>Potassium</b>                                       |                                      |      |      | 0.74    | 0.60 | 0.90 |

**Model 1:** N: 1642 (cases 888), AUC: 0.665 (0.639-0.692)

**Model 2** further adjusted for **potassium:** N: 1525 (cases 830), AUC: 0.672 (0.645-0.699)

**Table S13:** Odds ratio of coronary atherosclerotic lesions with  $\geq 50\%$  stenosis for a cardiovascular risk score with the accumulation of diabetes, smoking, kidney disease or glomerular filtrate rate $<60$  ml/min and hypertension, adjusted for age and sex (Model 1) and, additionally, potassium (Model 2).

|               | Odds ratio (95% confidence interval) |                   |
|---------------|--------------------------------------|-------------------|
|               | Model 1                              | Model 2           |
| Age           | 1.01 (1.00; 1.02)                    | 1.01 (1.00; 1.02) |
| Sex: women    | 0.33 (0.27; 0.42)                    | 0.33 (0.26; 0.41) |
| CV Risk SCORE | 1.48 (1.34; 1.65)                    | 1.50 (1.35; 1.68) |
| Potassium     |                                      | 0.67 (0.55; 0.81) |

**Model 1:** N: 1642 (cases 969), AUC: 0.660 (0.633-0.687), 1-residual/null deviance: 0.061, CV Cardiovascular;

**Model 2 further adjusted for potassium:** N: 1525 (cases 905), AUC: 0.667 (0.639-0.694), residual/null deviance: 0.067

**Table S14:** Odds ratio of coronary atherosclerotic lesions with  $\geq 70\%$  stenosis for a cardiovascular risk score with the accumulation of diabetes, smoking, kidney disease or glomerular filtrate rate $<60$  ml/min and hypertension, adjusted for age and sex (Model 1) and, additionally, potassium (Model 2).

|                      | Odds ratio (95% confidence interval) |                   |
|----------------------|--------------------------------------|-------------------|
|                      | Model 1                              | Model 2           |
| <b>Age</b>           | 1.00 (0.99; 1.01)                    | 1.00 (0.99; 1.01) |
| <b>Sex: women</b>    | 0.35 (0.28; 0.44)                    | 0.35 (0.28; 0.44) |
| <b>CV Risk SCORE</b> | 1.42 (1.28; 1.57)                    | 1.43 (1.28; 1.59) |
| <b>Potassium</b>     |                                      | 0.72 (0.60; 0.88) |

**Model 1:** N: 1642 (cases 888), AUC: 0.647 (0.621-0.674), 1-residual/null deviance: 0.053, CV Cardiovascular;

**Model 2 further adjusted for potassium:** N: 1525 (cases 830), AUC: 0.654 (0.626-0.681), residual/null deviance: 0.056
